# Supplementary material for: Effect of choline amino acid ionic liquids on maize seed germination and endogenous plant hormone levels
Source: Royal Society of Chemistry journal article supplement (doi:10.1039/d3ra07433a), 2024-01-01
Supplement: d3ra07433a1.pdf [file d3ra07433a1.pdf]

**Supplementary information for:**

**Effect of choline amino acid ionic liquids on maize seed germination and endogenous plant hormone levels**

Xiaohong Chen<sup>a</sup>, Rui Hao<sup>b</sup>, Wenquan Chen<sup>b</sup>, Huimin Jia<sup>b</sup>, Shufang Qin<sup>b</sup>, Qi Wang<sup>b</sup>, Dingxiang Zhang<sup>b</sup>, Zhaoxue Han<sup>a</sup>, Yajun Li<sup>b</sup>. \*

<sup>a</sup> *College of Life Sciences, Northwest A&F University, Yangling, Shaanxi, 712100, China*

<sup>b</sup> *College of Agronomy, Northwest A&F University, Yangling, Shaanxi, 712100, China*

\*Corresponding author:

Yajun Li

Tel.: +86 29 87082845;

E-mail address: [yajunli@nwfau.edu.cn](mailto:yajunli@nwfau.edu.cn)

Table of contents:

Preparation and characterization of cholinium amino acid ionic liquids

Spectroscopic data for seven [Chl][AA] ILs

References

## Preparation and characterization of choline amino acid ionic liquids

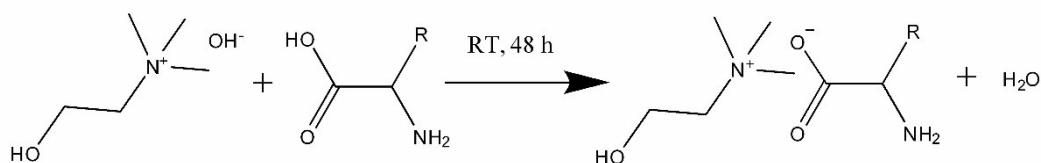

**Fig. S1. The synthesis of choline amino acid ionic liquids**

R: the group differing in different amino acids

Choline amino acid ILs were synthesized according to previously described methods [1, 2] with some modifications (Fig. S1). An aqueous solution of choline hydroxide was added drop wise to aqueous solutions of amino acids in a 1:1 molar ratio. The mixtures were stirred for 48 h at 20°C, followed by evaporation of the water under reduced pressure at 60°C, and were subsequently stored under moisture-free conditions until utilization. This one-step procedure is a typical atom-economic reaction that does not yield any toxic by-products. All seven ILs were in liquid form at room temperature, and with the exception of choline tryptophan ([Chl][Trp]), these ILs exhibited hues ranging from light yellow to yellowish brown (Fig. S2). These colors tended to deepen with increased temperature and time.

The [Chl][AA] ILs thus obtained were characterized by means of proton nuclear magnetic resonance (<sup>1</sup>H NMR) analysis carried out in D<sub>2</sub>O using a Bruker AVANCE Digital 500 MHz spectrometer, with tetramethylsilane used as an internal standard. The yields of all the desired products were found to be greater than 95% (Table S1).

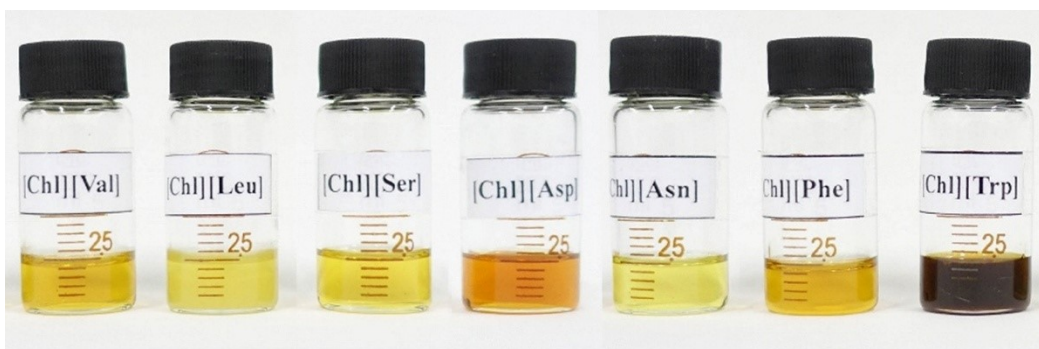

**Fig. S2. The seven choline amino acid ionic liquids ([Chl][AA] ILs) synthesized in this study.**

[Chl][Val]: choline valine, [Chl][Leu]: choline leucine, [Chl][Ser]: choline serine, [Chl][Asp]: choline aspartic acid, [Chl][Asn]: choline asparagine, [Chl][Phe]: choline phenylalanine, [Chl][Trp]: choline tryptophan.

### **<sup>1</sup>H NMR spectra for seven choline amino acid ionic liquids**

Table S1 <sup>1</sup>H NMR data of seven [Chl][AA]

| ILs        | $\delta$ /ppm                                                                                                                                                                                 |
|------------|-----------------------------------------------------------------------------------------------------------------------------------------------------------------------------------------------|
| [Chl][Val] | 0.83 (t, J = 9.44 Hz, 3H), 0.89 (d, J = 6.53 Hz, 3H), 1.89 (td, J = 12.62, 6.22 Hz, 1H), 3.01 (d, J = 4.48 Hz, 1H), 3.16 (s, 9H), 3.47 (d, J = 3.64 Hz, 2H), 4.01 (s, 2H)                     |
| [Chl][Leu] | 0.86 (m, 6H), 1.34 (m, 1H), 1.44 (td, J = 13.34, 6.64 Hz, 1H), 1.61 (qd, J = 12.49, 6.36, 6.06 Hz, 1H), 4.02 (s, 2H), 3.47 (d, J = 3.94 Hz, 2H), 3.16 (s, 9H), 3.23 (m, 1H)                   |
| [Chl][Ser] | 3.13 (s, 9H), 3.29 (s, 1H), 3.45 (s, 2H), 3.67 (dd, J = 24.92, 8.34 Hz, 2H), 3.99 (s, 2H)                                                                                                     |
| [Chl][Asp] | 2.62 (dd, J = 17.39, 8.86 Hz, 1H), 2.76 (d, J = 17.39 Hz, 1H), 3.15 (s, 9H), 3.46 (s, 2H), 3.84 (d, J = 8.69 Hz, 1H), 4.01 (s, 2H)                                                            |
| [Chl][Asn] | 2.39 (dd, J = 14.72, 9.06 Hz, 1H), 2.63 (dd, J = 14.88, 4.27 Hz, 1H), 3.15 (s, 9H), 3.46 (d, J = 3.98 Hz, 2H), 3.54 (dd, J = 8.40, 4.50 Hz, 1H), 4.01 (s, 2H)                                 |
| [Chl][Phe] | 2.79 (dd, J = 12.99, 7.61 Hz, 1H), 2.94 (dd, J = 13.16, 3.89 Hz, 1H), 3.08 (s, 9H), 3.39 (s, 2H), 3.45 (t, J = 5.73 Hz, 1H), 3.95 (s, 2H), 7.27 (m, 5H)                                       |
| [Chl][Trp] | 2.97(m, 1H), 3.01 (s, 9H), 3.13 (m, 1H), 3.30 (s, 2H), 3.53 (t, J = 5.60 Hz, 1H), 3.89 (s, 2H), 7.11 (t, J = 7.18 Hz, 1H), 7.18 (m, 2H), 7.44 (d, J = 8.07 Hz, 1H), 7.67 (d, J = 7.84 Hz, 1H) |

## References

1. Moriel, P., E.J. Garcia-Suarez, M. Martinez, A.B. Garcia, M.A. Montes-Moran, V. Calvino-Casilda, and M.A. Banares, Synthesis, characterization, and catalytic activity of ionic liquids based on biosources. *Tetrahedron Letters*, 2010. **51**(37): p. 4877-4881.
2. Liu, Q.P., X.D. Hou, N. Li, and M.H. Zong, Ionic liquids from renewable biomaterials: synthesis, characterization and application in the pretreatment of biomass. *Green Chemistry*, 2012. **14**(2): p. 304-307.
